# Supplementary material for: Chromatin Profiles Are Prognostic of Clinical Response to Bortezomib-Containing Chemotherapy in Pediatric Acute Myeloid Leukemia: Results from the COG AAML1031 Trial
Source: MDPI journal article supplement (doi:10.3390/cancers16081448), 2024-04-09

**A**

|          |         | No Relapse | Relapse after EO12 |
|----------|---------|------------|--------------------|
|          |         | EO12       |                    |
| ASH2L    | ADE     | 0.000      | 0.031              |
|          | ADE+BTZ | 0.000      | 0.013              |
| BMI1     | ADE     | 0.790      | 0.570              |
|          | ADE+BTZ | 0.690      | 0.670              |
| BRD4     | ADE     | 0.011      | 0.190              |
|          | ADE+BTZ | 0.082      | 0.110              |
| CLPP     | ADE     | 0.040      | 0.460              |
|          | ADE+BTZ | 0.510      | 0.300              |
| hnRNPK   | ADE     | 0.001      | 0.190              |
|          | ADE+BTZ | 0.001      | 0.018              |
| JMJD6    | ADE     | 0.007      | 0.100              |
|          | ADE+BTZ | 0.003      | 0.010              |
| KDM1A    | ADE     | 0.000      | 0.027              |
|          | ADE+BTZ | 0.000      | 0.001              |
| NCL      | ADE     | 0.000      | 0.064              |
|          | ADE+BTZ | 0.000      | 0.003              |
| NPM1     | ADE     | 0.180      | 0.390              |
|          | ADE+BTZ | 0.031      | 0.033              |
| HDAC1    | ADE     | 0.700      | 0.590              |
|          | ADE+BTZ | 0.800      | 0.990              |
| HDAC2    | ADE     | 0.000      | 0.100              |
|          | ADE+BTZ | 0.003      | 0.130              |
| HDAC3    | ADE     | 0.100      | 0.220              |
|          | ADE+BTZ | 0.001      | 0.210              |
| HDAC6    | ADE     | 0.120      | 0.610              |
|          | ADE+BTZ | 0.025      | 0.110              |
| SIRT1    | ADE     | 0.021      | 0.014              |
|          | ADE+BTZ | 0.037      | 0.980              |
| SIRT6    | ADE     | 0.100      | 0.230              |
|          | ADE+BTZ | 0.090      | 0.420              |
| WTAP     | ADE     | 0.000      | 0.076              |
|          | ADE+BTZ | 0.000      | 0.002              |
| H3K4Me2  | ADE     | 0.240      | 0.360              |
|          | ADE+BTZ | 0.096      | 0.620              |
| H3K4Me3  | ADE     | 0.006      | 0.130              |
|          | ADE+BTZ | 0.003      | 0.230              |
| H3K9Me2  | ADE     | 0.150      | 1.000              |
|          | ADE+BTZ | 0.091      | 0.670              |
| H3K27Me3 | ADE     | 0.130      | 0.760              |
|          | ADE+BTZ | 0.110      | 0.300              |
| H3K36Me3 | ADE     | 0.002      | 0.220              |
|          | ADE+BTZ | 0.015      | 0.028              |

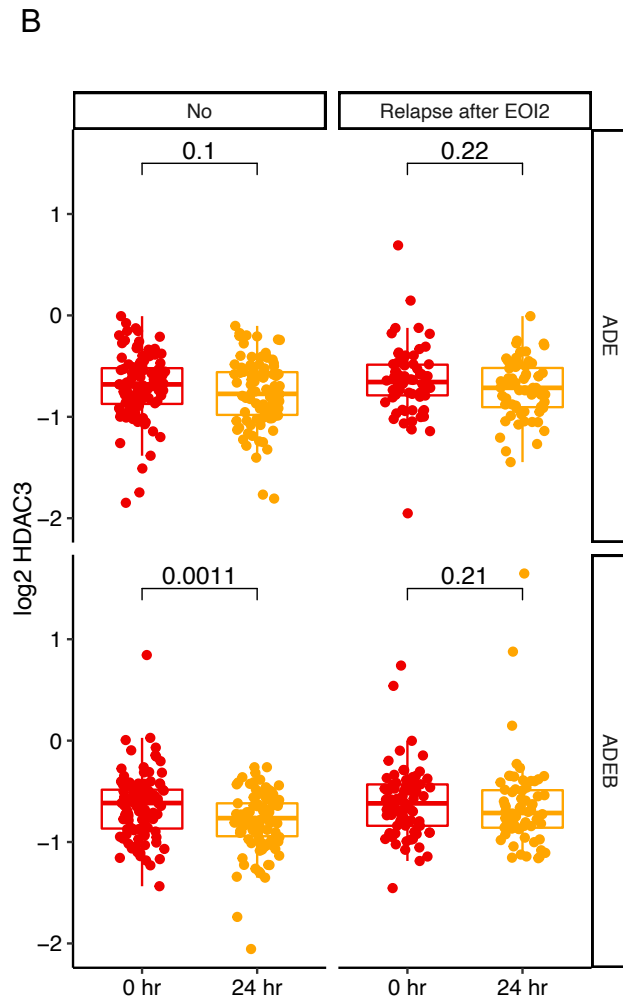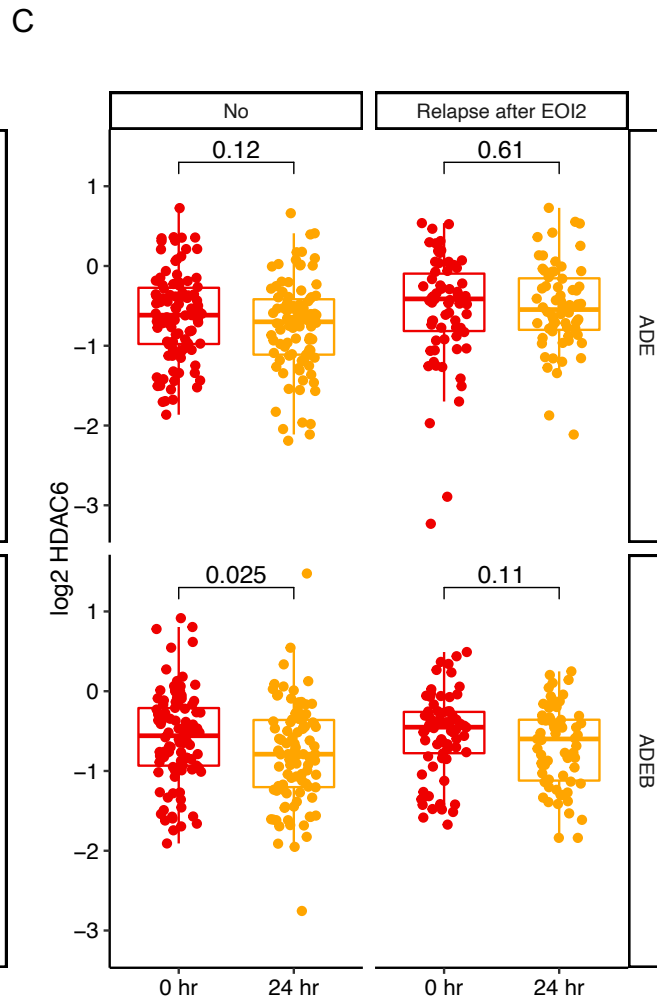

Supplement: s1 [file s1]
