# Supplementary material for: Chromatin Profiles Are Prognostic of Clinical Response to Bortezomib-Containing Chemotherapy in Pediatric Acute Myeloid Leukemia: Results from the COG AAML1031 Trial
Source: MDPI journal article supplement (doi:10.3390/cancers16081448), 2024-04-09

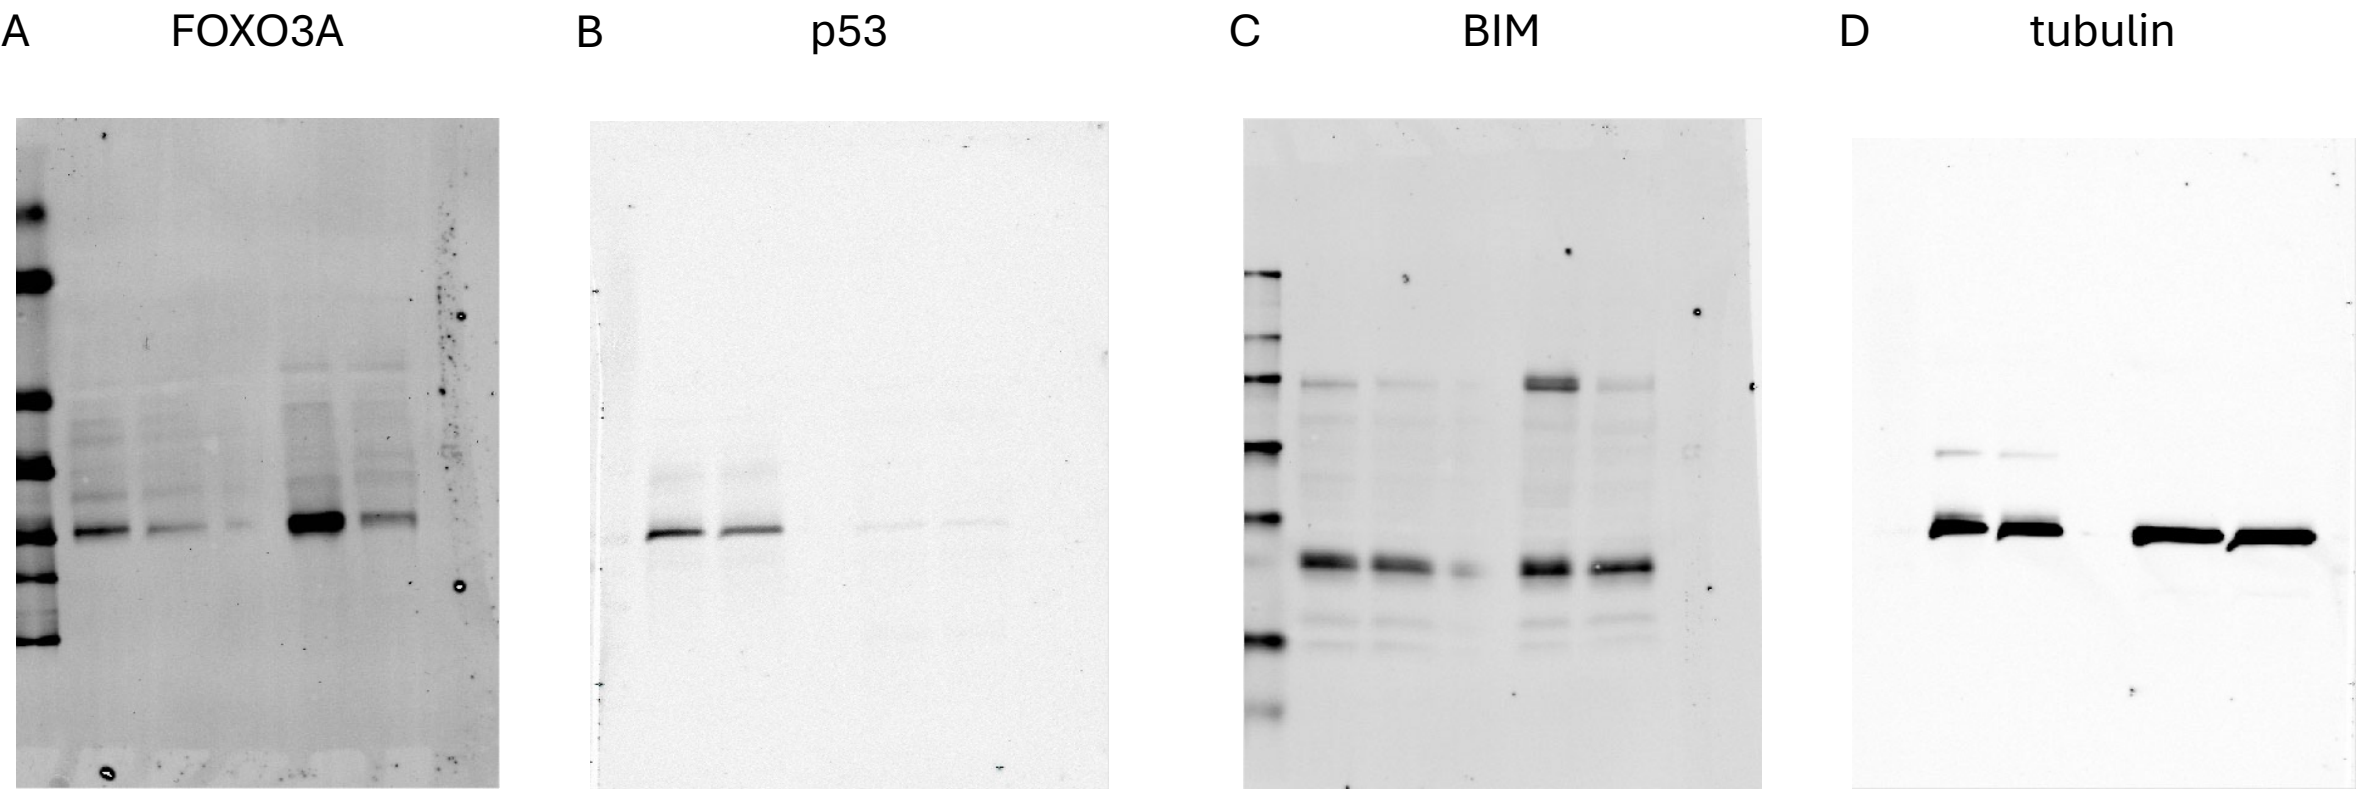

E

|             | FOXO3A   |         |        |         | p53      |         |        |         | BIM      |         |        |         | tubulin (loading control) |         |        |         |
|-------------|----------|---------|--------|---------|----------|---------|--------|---------|----------|---------|--------|---------|---------------------------|---------|--------|---------|
|             | OCI-AML3 |         | THP.1  |         | OCI-AML3 |         | THP.1  |         | OCI-AML3 |         | THP.1  |         | OCI-AML3                  |         | THP.1  |         |
|             | shGIPZ   | shFOXO3 | shGIPZ | shFOXO3 | shGIPZ   | shFOXO3 | shGIPZ | shFOXO3 | shGIPZ   | shFOXO3 | shGIPZ | shFOXO3 | shGIPZ                    | shFOXO3 | shGIPZ | shFOXO3 |
| Protein     | 150      | 117     | 202    | 131     | 98       | 80      | 22     | 23      | 142      | 129     | 139    | 142     | 91                        | 92      | 126    | 119     |
| Background  | 94       | 93      | 98     | 94      | 21       | 22      | 18     | 18      | 57       | 55      | 55     | 53      | 6                         | 7       | 7      | 8       |
| Net protein | 56       | 24      | 104    | 37      | 77       | 58      | 4      | 5       | 85       | 74      | 84     | 89      | 85                        | 85      | 119    | 111     |
| Ratio       | 0,659    | 0,282   | 0,874  | 0,333   | 0,906    | 0,682   | 0,034  | 0,045   | 1,000    | 0,871   | 0,706  | 0,802   | 1                         | 1       | 1      | 1       |

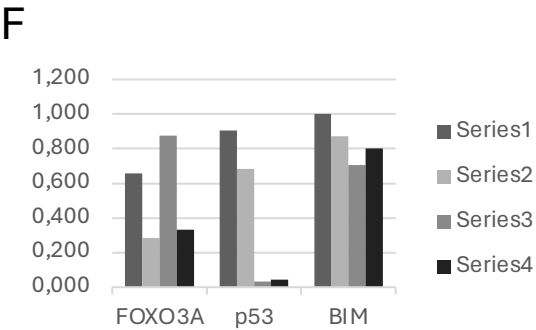

Supplement: s1 [file s1]
