# Supplementary figures and images for: Chromatin Profiles Are Prognostic of Clinical Response to Bortezomib-Containing Chemotherapy in Pediatric Acute Myeloid Leukemia: Results from the COG AAML1031 Trial
Source: MDPI journal article supplement (doi:10.3390/cancers16081448), 2024-04-09

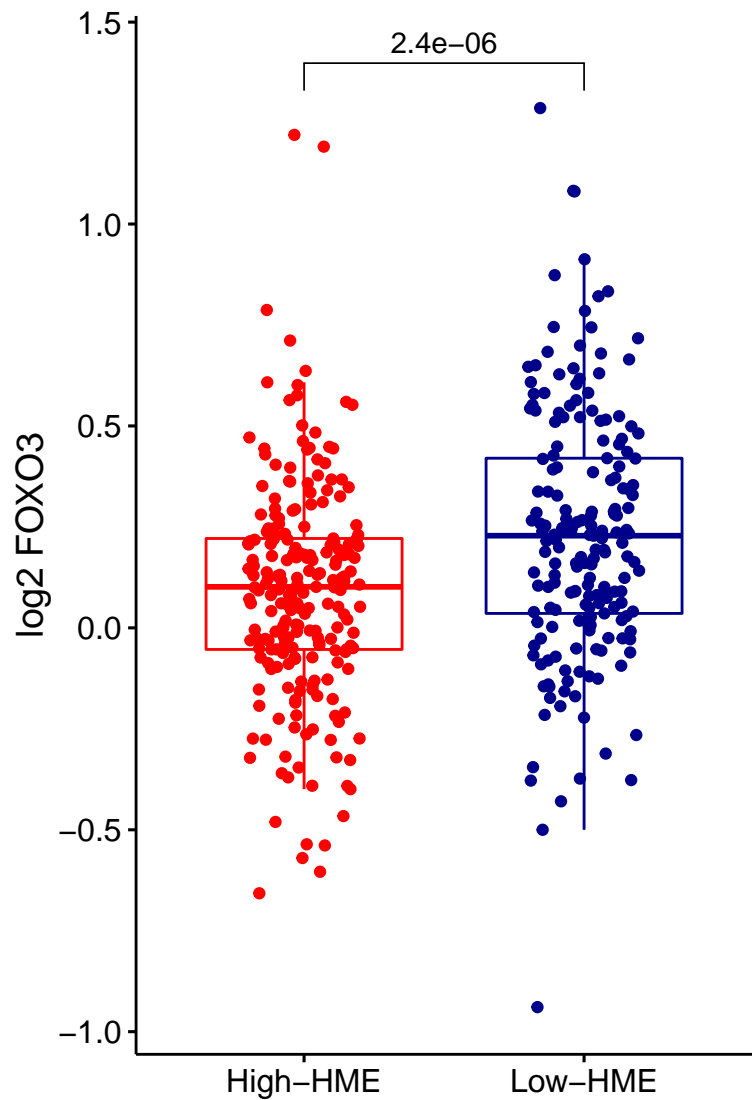

Supplement: s1 [file s1]

# OCI-AML3

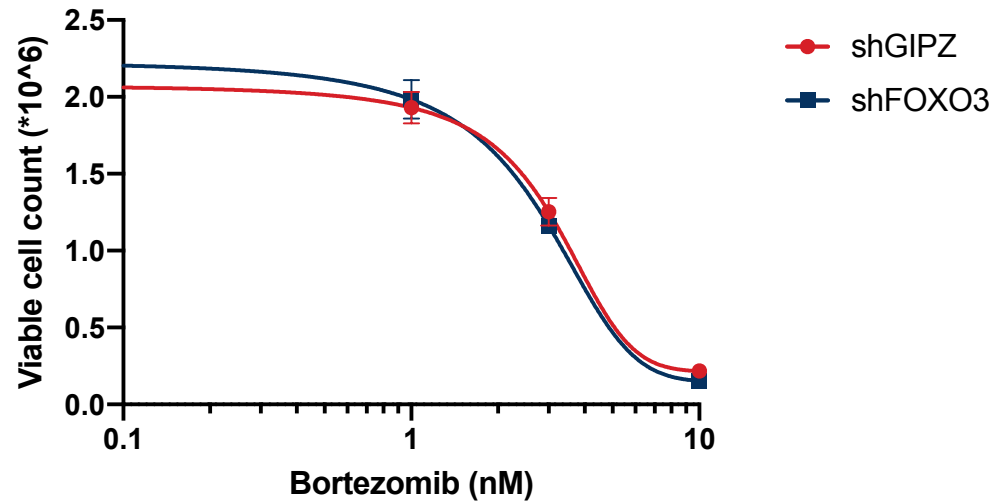

Supplement: s1 [file s1]

### Differentially expressed genes between low and high FOXO3 expressors

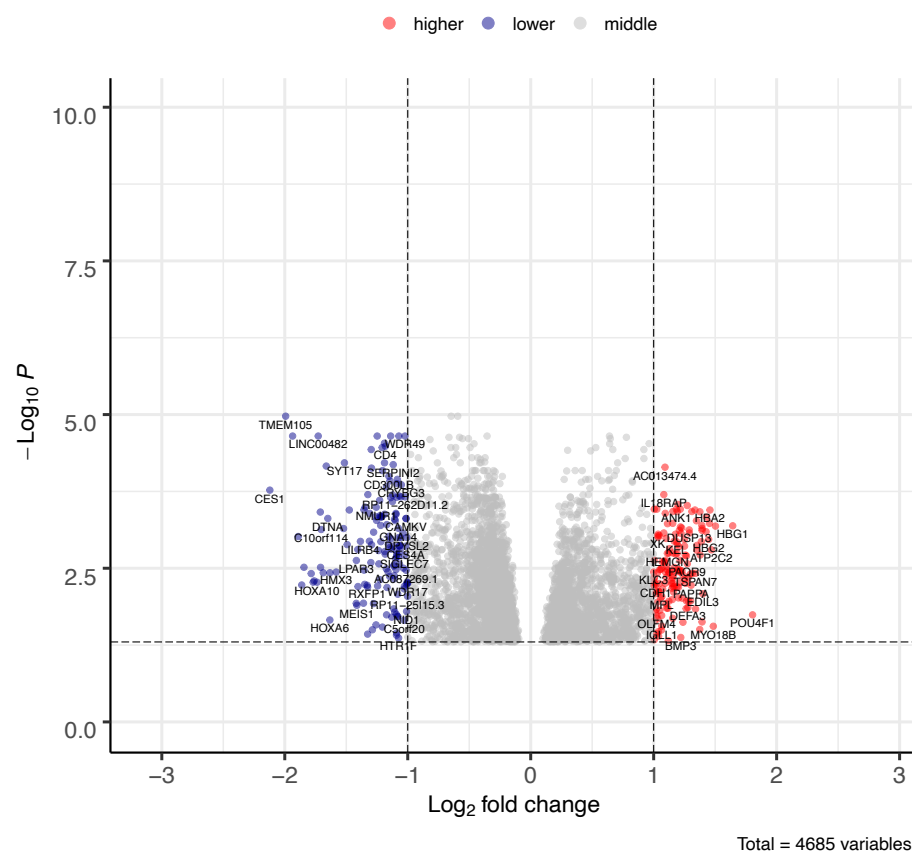

# B

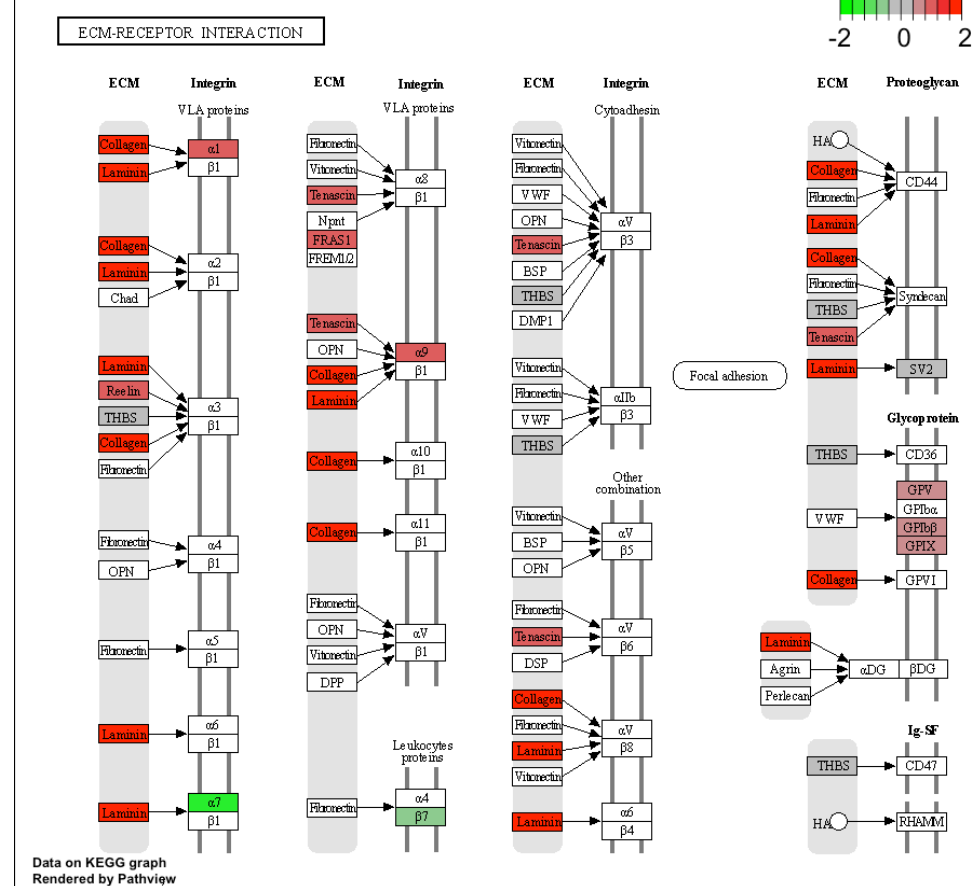

C

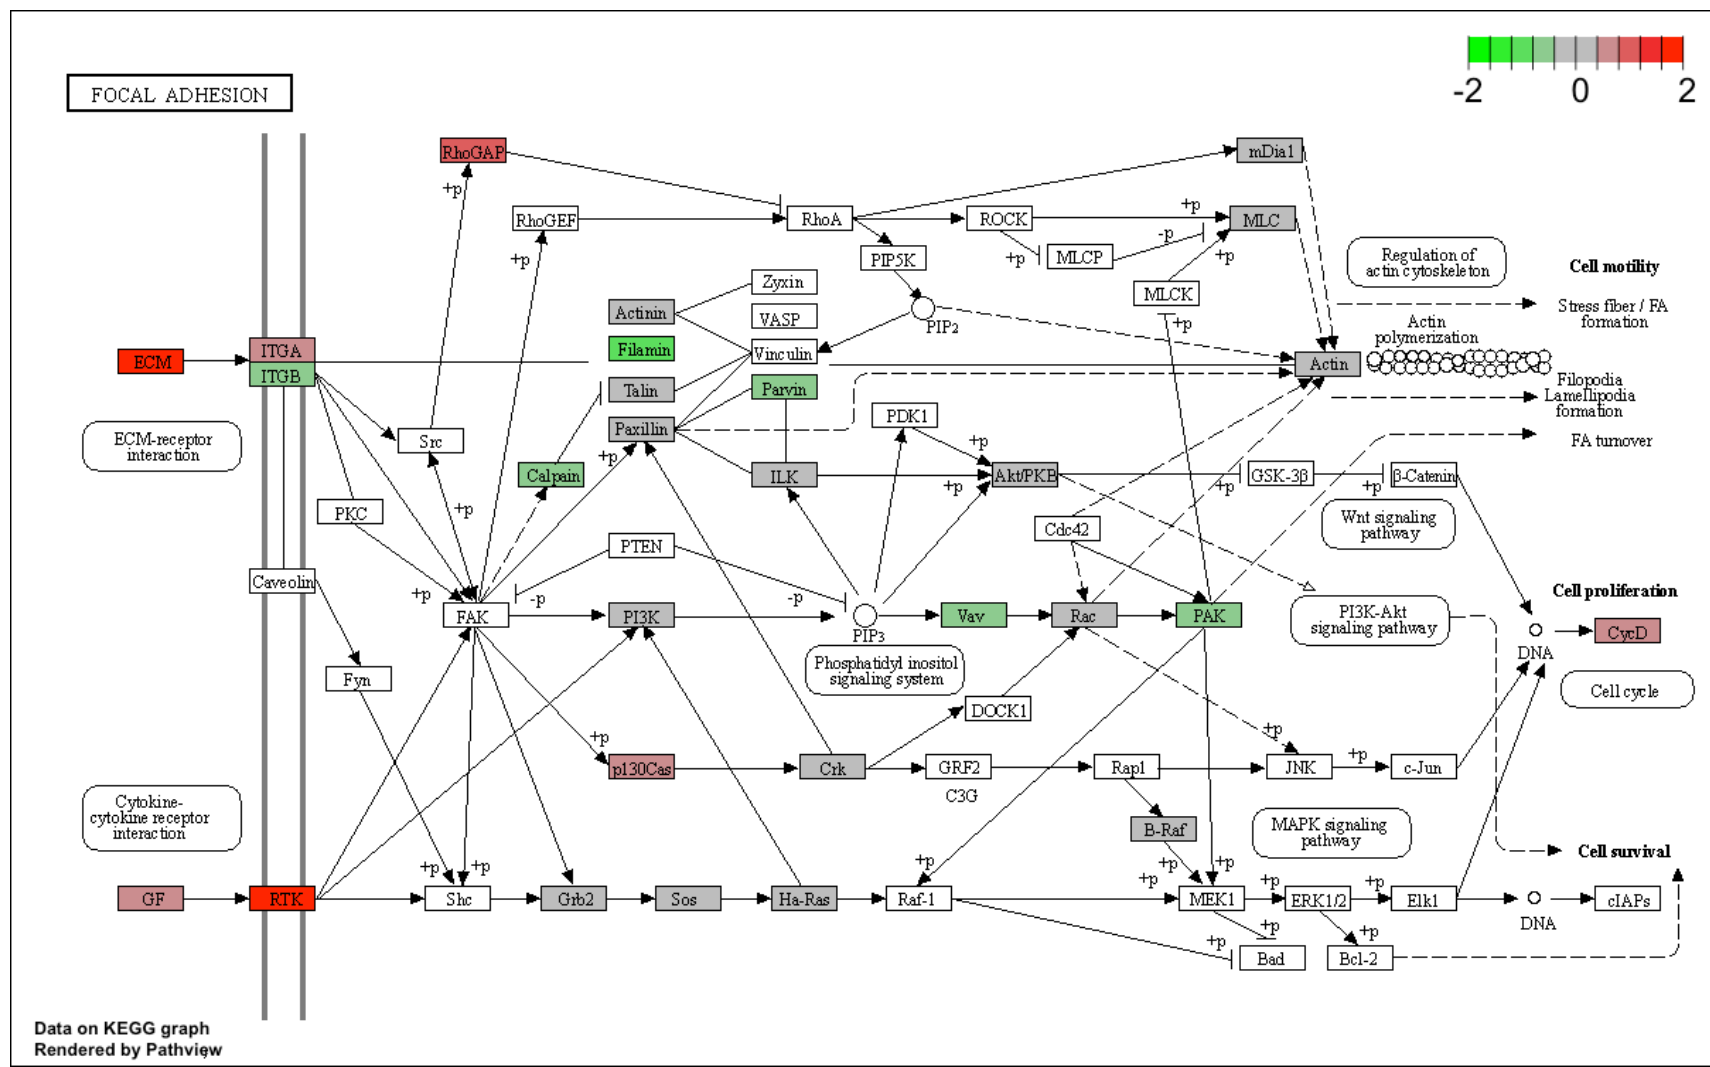

Supplement: s1 [file s1]

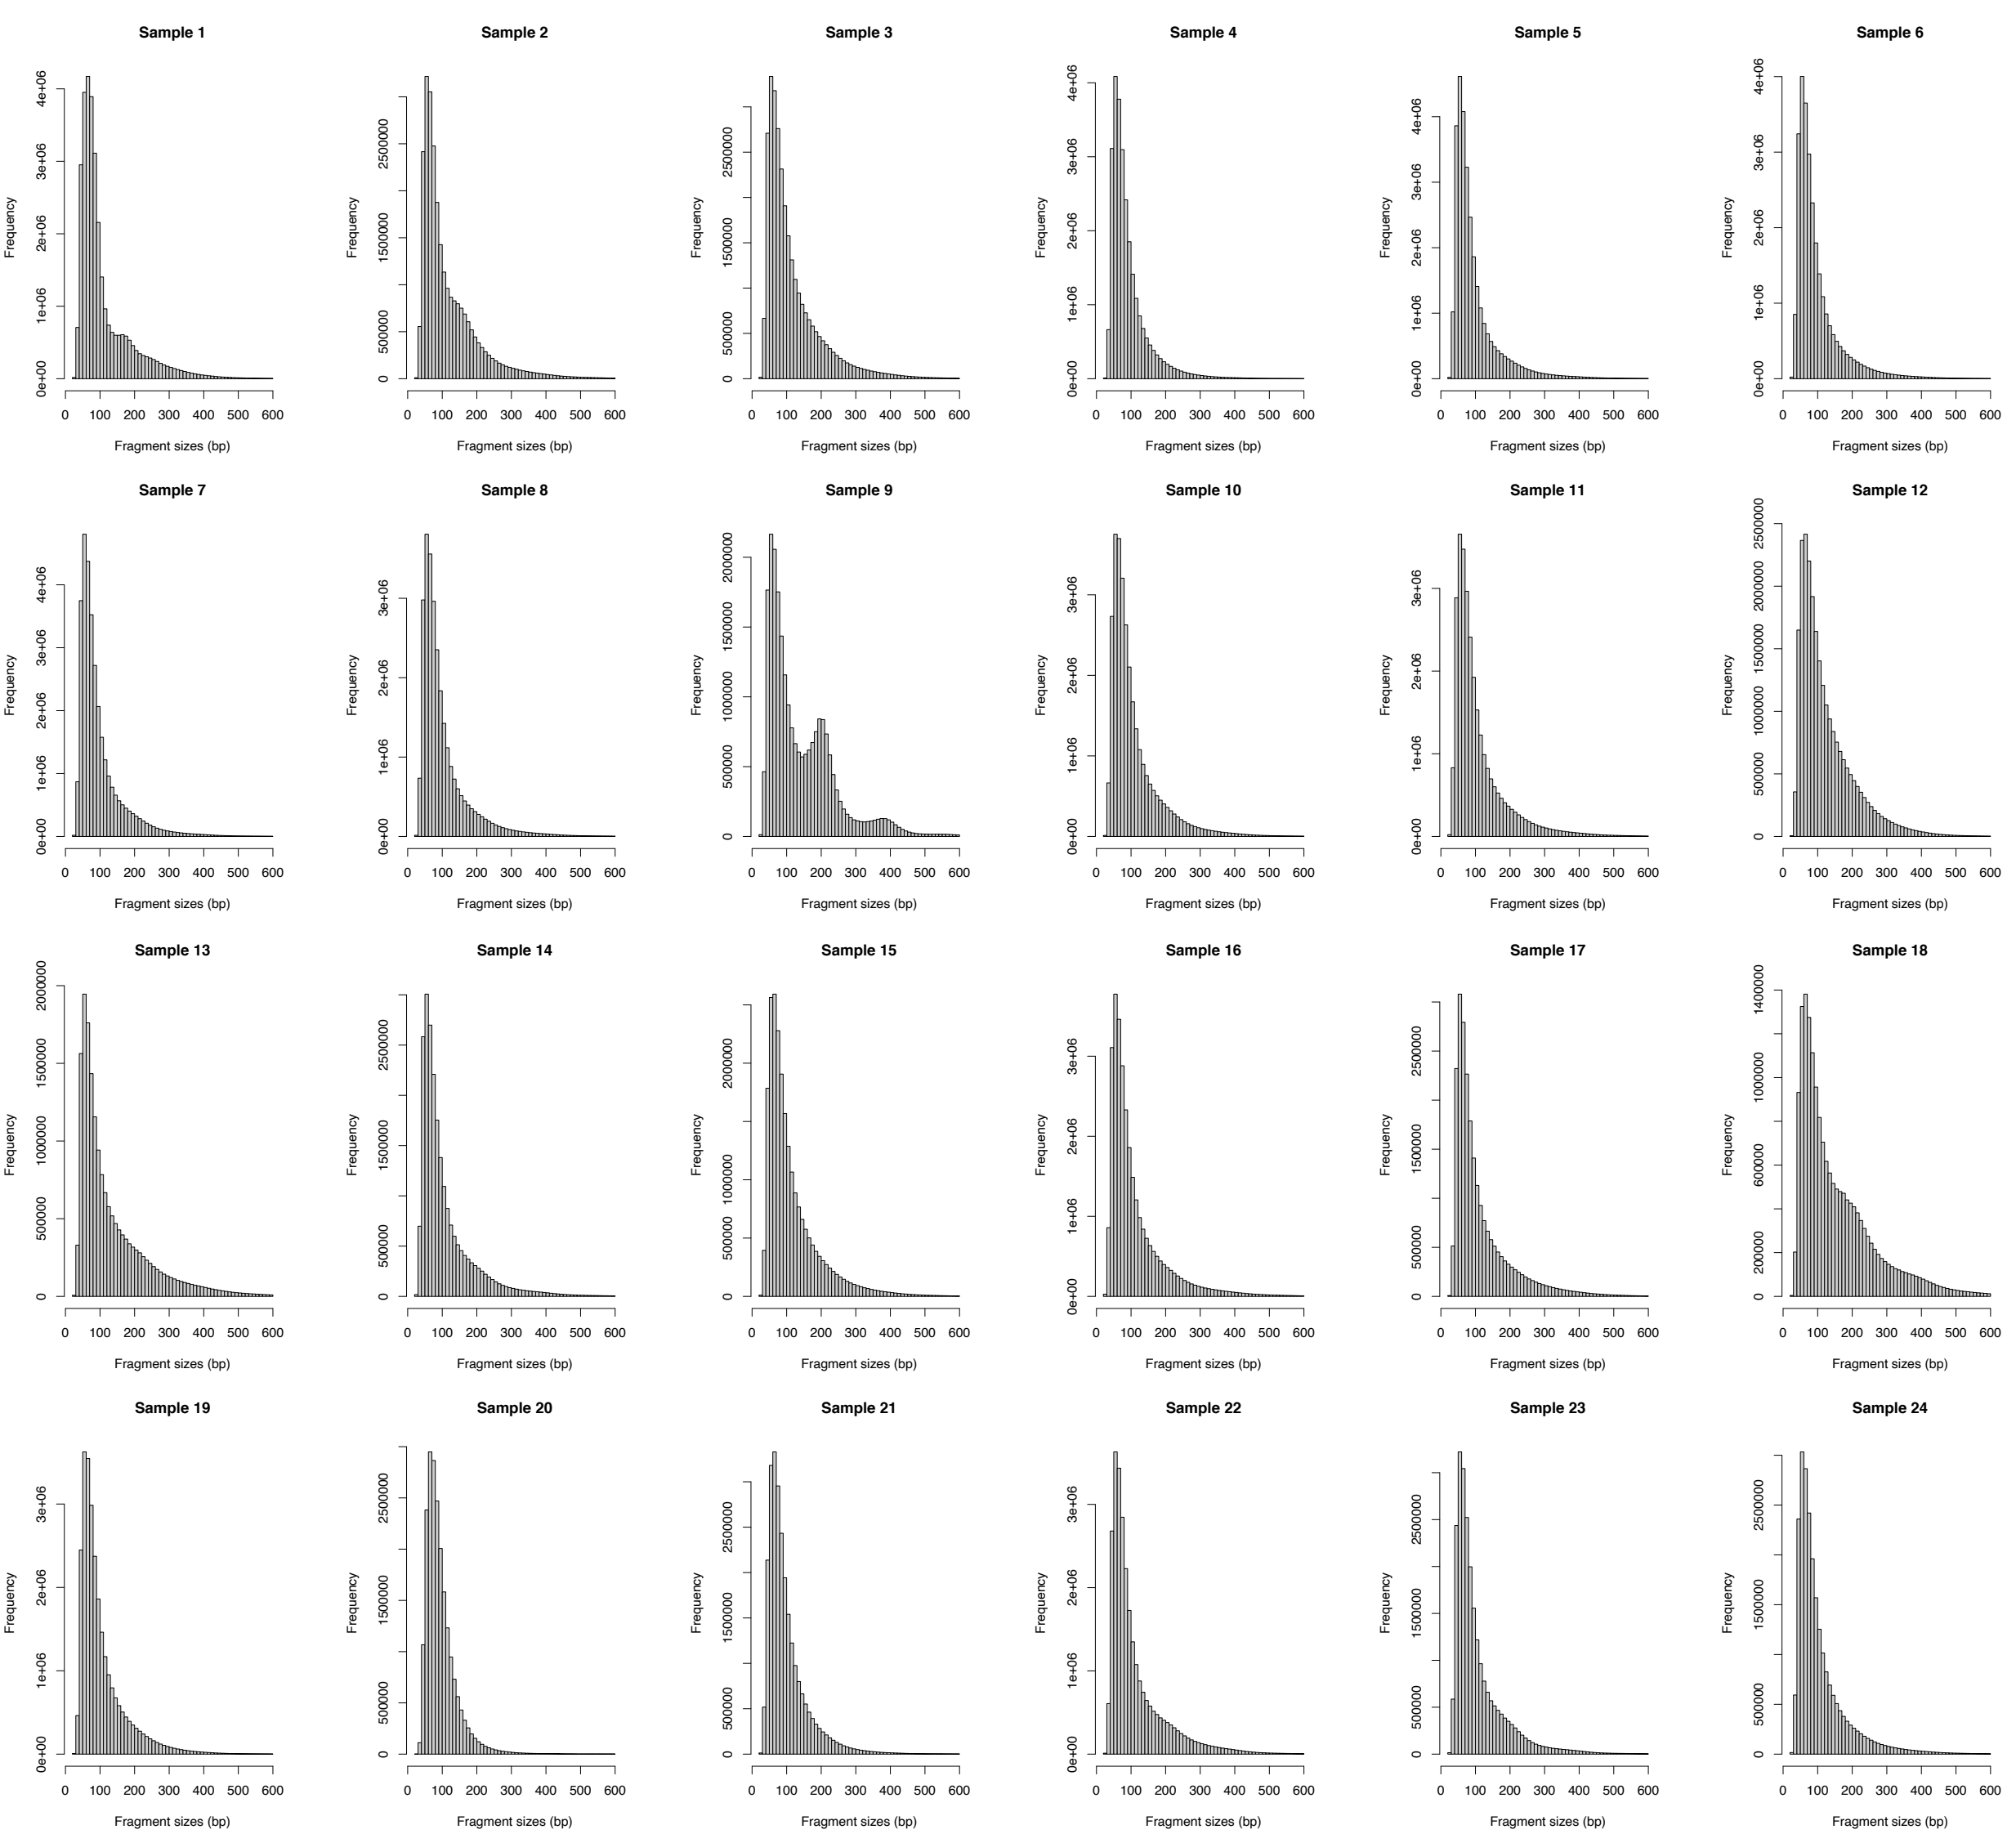

Supplement: s1 [file s1]

A

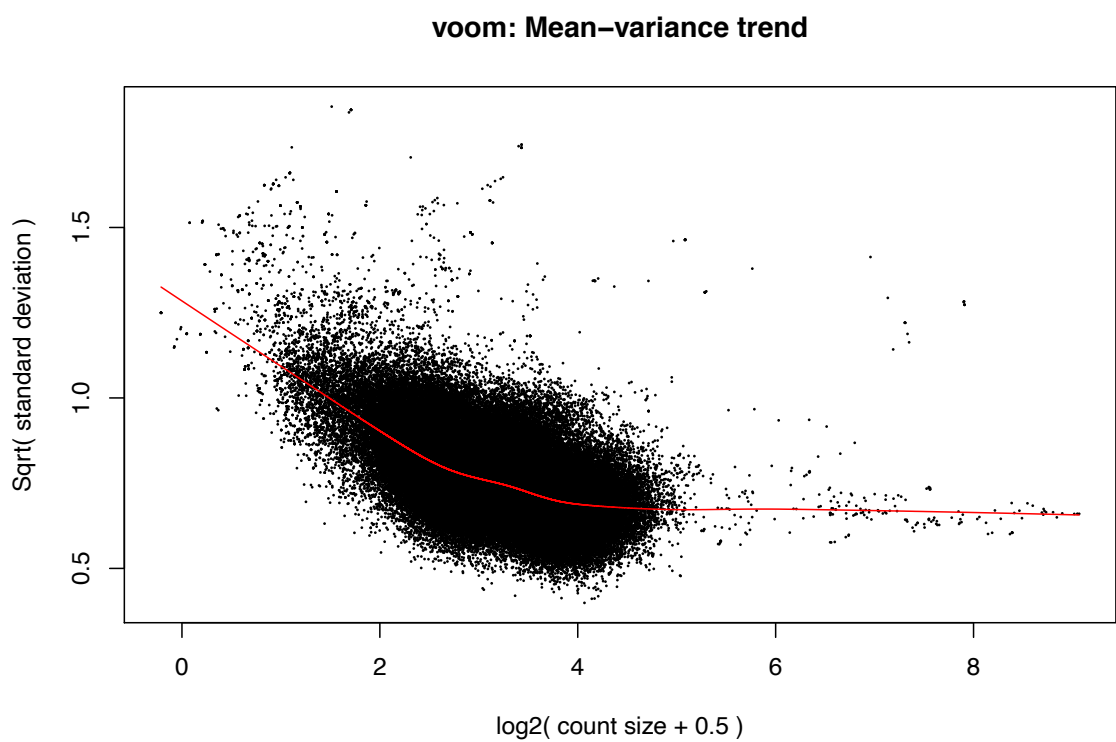

B

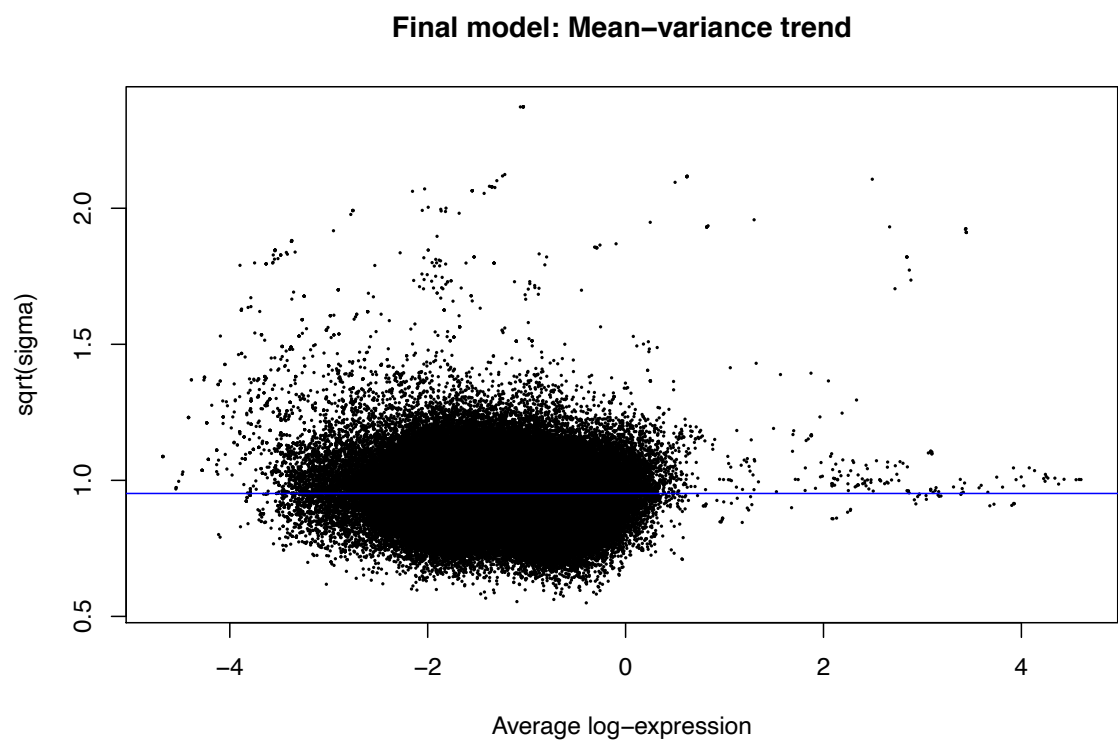

C

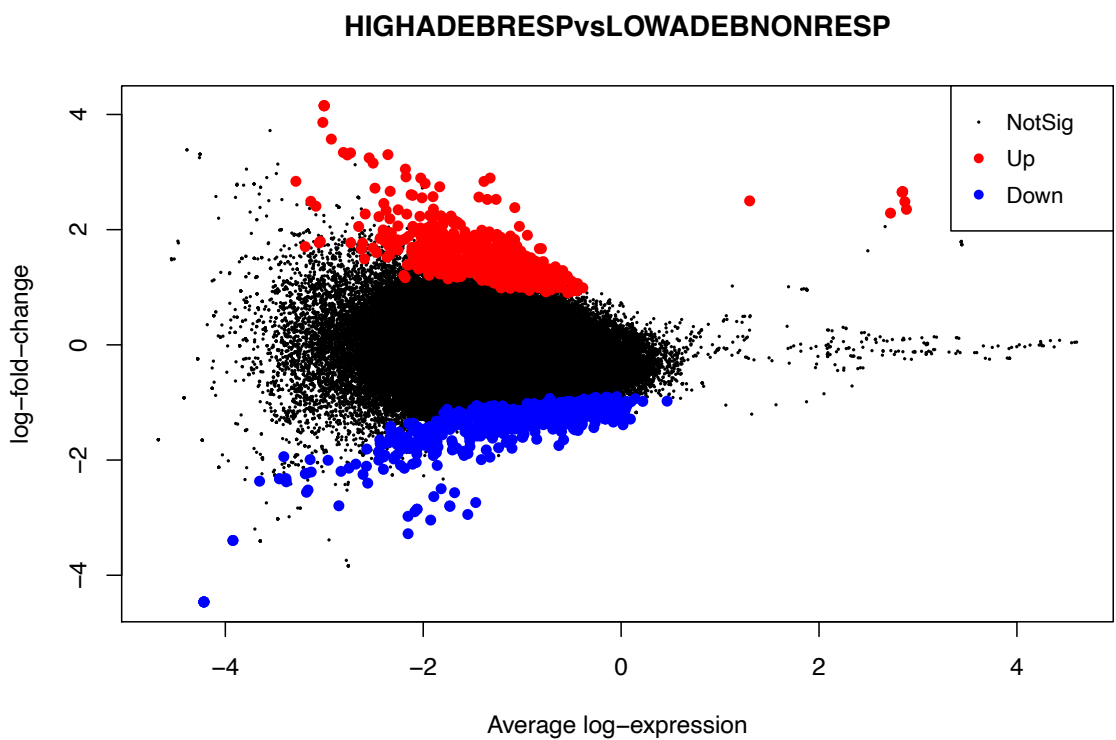

D

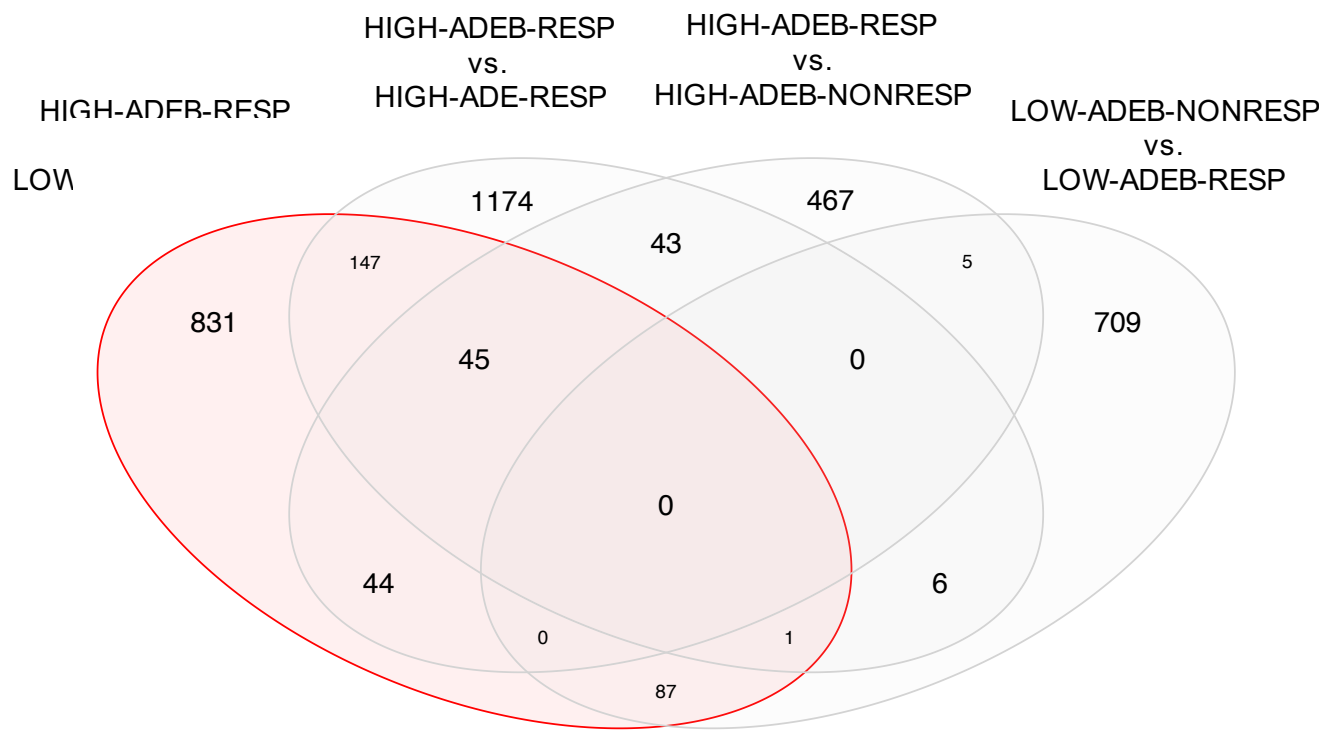

E

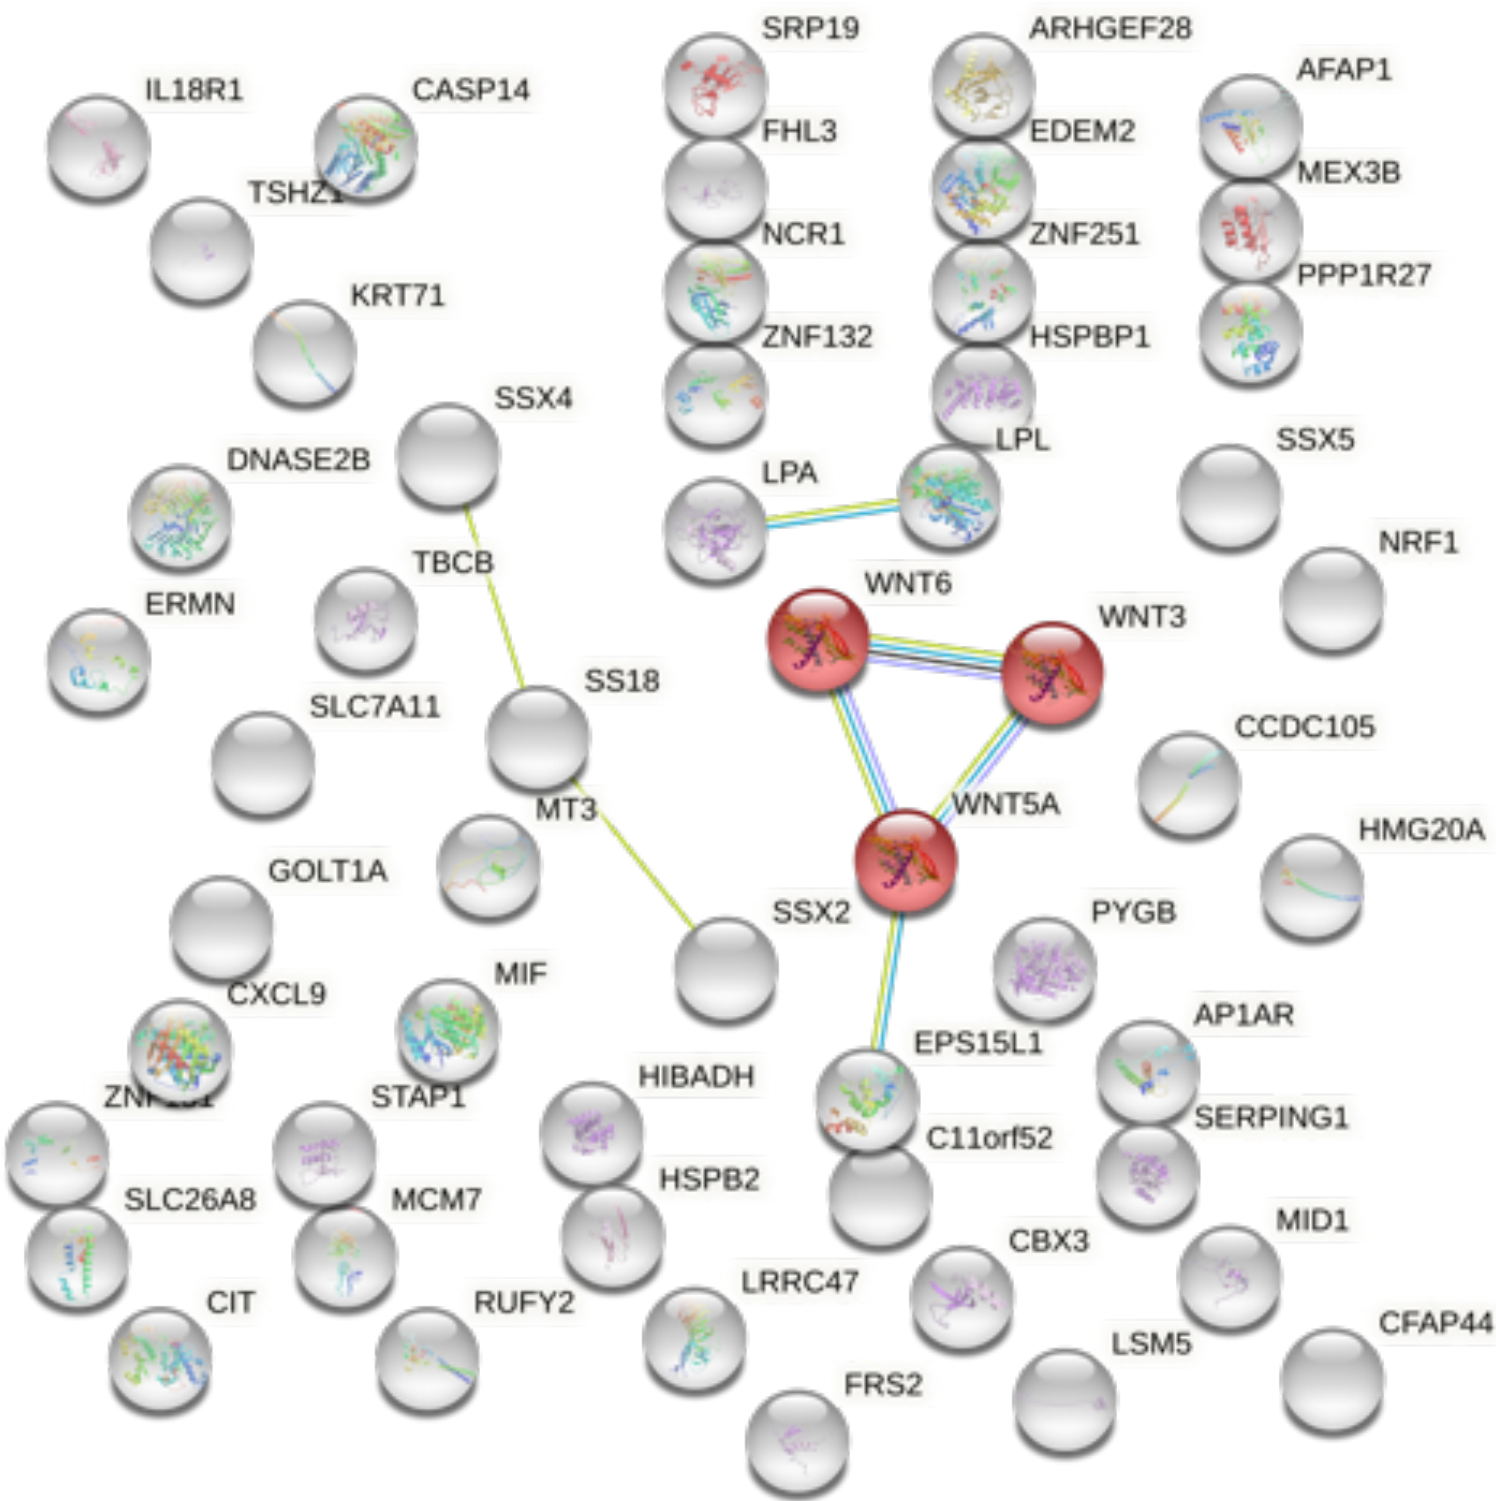

F

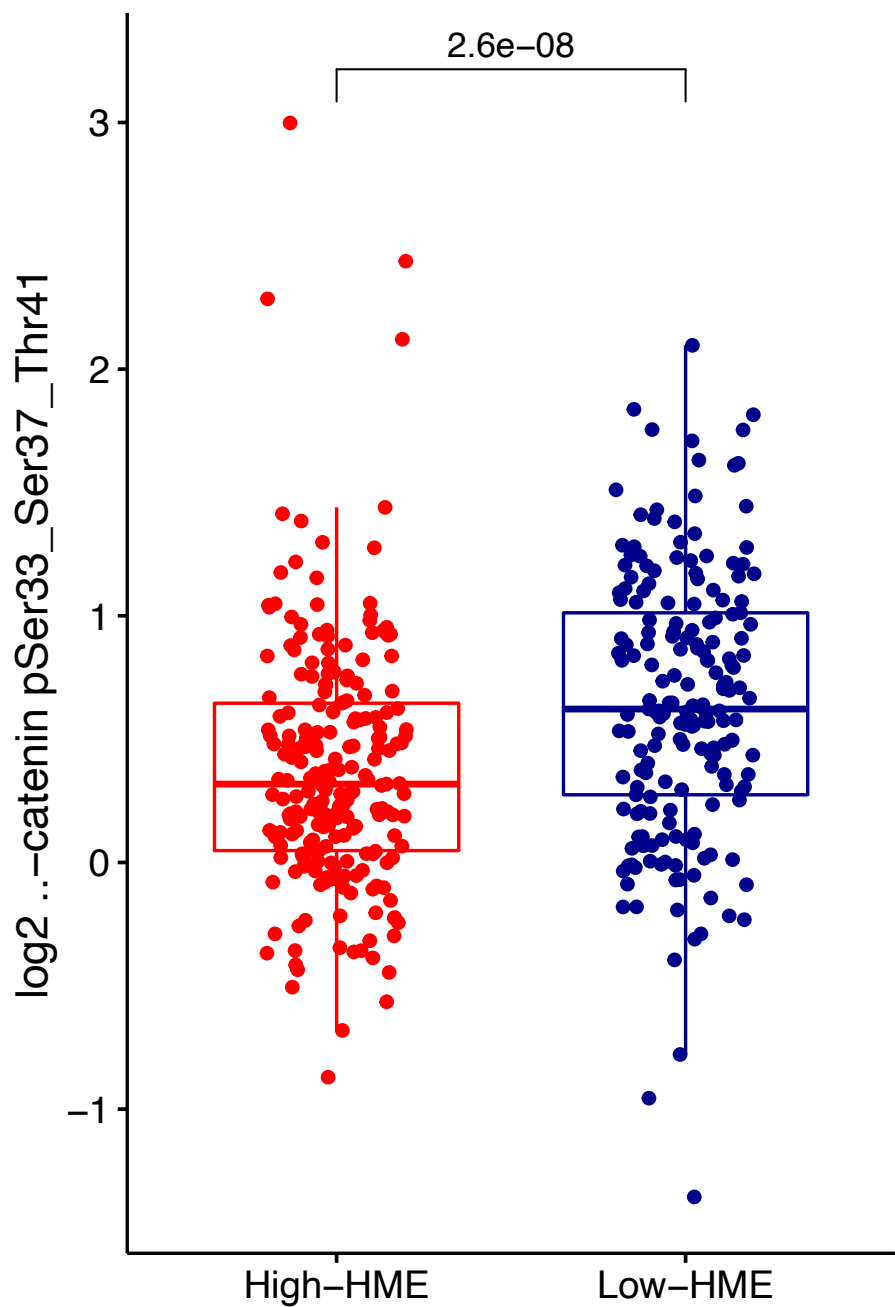

Supplement: s1 [file s1]
